# Supplementary material for: The stable carbon isotope signature of methane produced by saprotrophic fungi
Source: Copernicus journal article supplement (doi:10.5194/bg-17-3891-2020), 2020-07-31
Supplement: Supplementary file 1 [file bg-17-3891-2020-supplement.pdf]

Supplement of Biogeosciences, 17, 3891–3901, 2020  
<https://doi.org/10.5194/bg-17-3891-2020-supplement>  
© Author(s) 2020. This work is distributed under  
the Creative Commons Attribution 4.0 License.

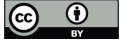

*Supplement of*

## **The stable carbon isotope signature of methane produced by saprotrophic fungi**

**Moritz Schroll et al.**

*Correspondence to:* Moritz Schroll ([moritz.schroll@geow.uni-heidelberg.de](mailto:moritz.schroll@geow.uni-heidelberg.de)) and Katharina Lenhart ([k.lenhart@th-bingen.de](mailto:k.lenhart@th-bingen.de))

The copyright of individual parts of the supplement might differ from the CC BY 4.0 License.

## Supplement

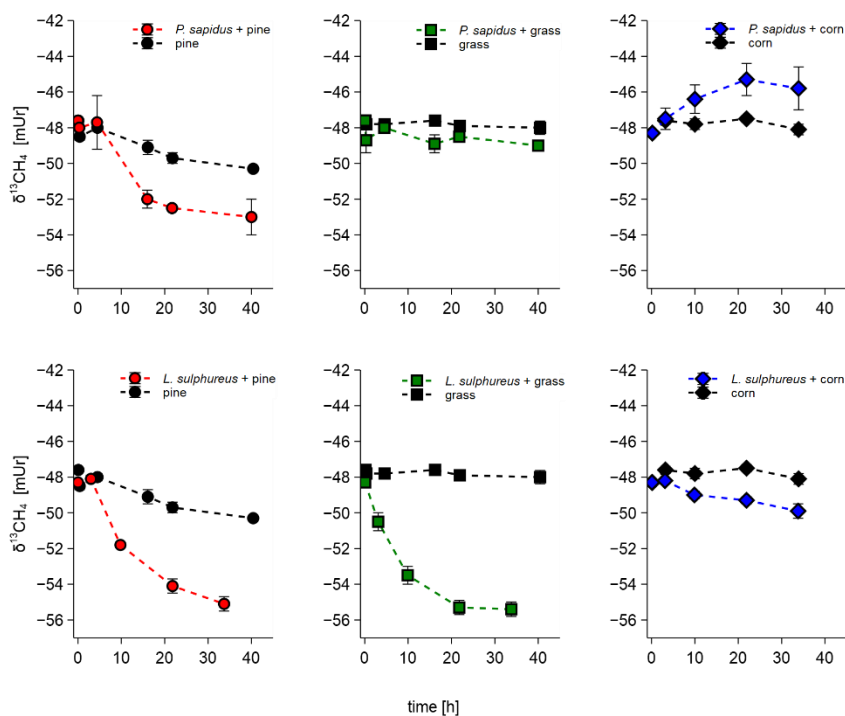

**Figure S1:** Stable carbon isotope values of CH<sub>4</sub> of *P. sapidus* (a-c) and *L. sulphureus* (d-f) grown on pine, grass, and corn. Values are presented as mean values with SD (n=3), except for δ<sup>13</sup>C-CO<sub>2</sub> of *L. sulphureus* grown on corn (n=2).

5

**Table S1:** Statistical data including p-values of two-way ANOVA analysis performed to test the significance of “species”, “substrate” effects on CH<sub>4</sub> and CO<sub>2</sub> emission rates, the CH<sub>4</sub> : CO<sub>2</sub> emission ratios, δ<sup>13</sup>C-CH<sub>4</sub> and δ<sup>13</sup>C-CO<sub>2</sub> source signatures by *P. sapidus* and *L. sulphureus*.

|                                   |                  | p-value | f-value |
|-----------------------------------|------------------|---------|---------|
| δ <sup>13</sup> C-CH <sub>4</sub> | Species effect   | < 0.001 | 100     |
|                                   | Substrate effect | < 0.001 | 147     |
| δ <sup>13</sup> C-CO <sub>2</sub> | Species effect   | 0.008   | 10      |
|                                   | Substrate effect | < 0.001 | 742     |
| CH <sub>4</sub> emission rates    | Species effect   | 0.03    | 6.5     |

|                                                       |                  |         |      |
|-------------------------------------------------------|------------------|---------|------|
|                                                       | Substrate effect | < 0.001 | 14   |
| <b>CO<sub>2</sub> emission rates</b>                  | Species effect   | < 0.001 | 53   |
|                                                       | Substrate effect | < 0.001 | 75   |
| <b>CH<sub>4</sub> : CO<sub>2</sub> emission ratio</b> | Species effect   | 0.47    | 0.55 |
|                                                       | Substrate effect | 0.07    | 3.4  |

10
